# Supplementary material for: Oxidative addition of elemental selenium to 1,4,2,5-diazadiborinine
Source: Royal Society of Chemistry journal article supplement (doi:10.1039/c9dt01081e), 2019-01-01
Supplement: c9dt01081e1.pdf [file c9dt01081e1.pdf]

## Supporting Information

### Oxidative Addition of Elemental Selenium to 1,4,2,5-Diazadiborinine

Gillian Kor Hwee Goh, Yongxin Li, and Rei Kinjo\*

DOI: 10.1039/x0xx00000x

#### Contents:

1. Physical and spectroscopic data for compounds **2**, **3** and **4**
2. UV/Vis absorption spectroscopy for compound **3**
3. Crystallographic data for compounds **2**, **3** and **4**
4. Computational data
5. References

# 1. Physical and spectroscopic data for compounds 2,3 and 4

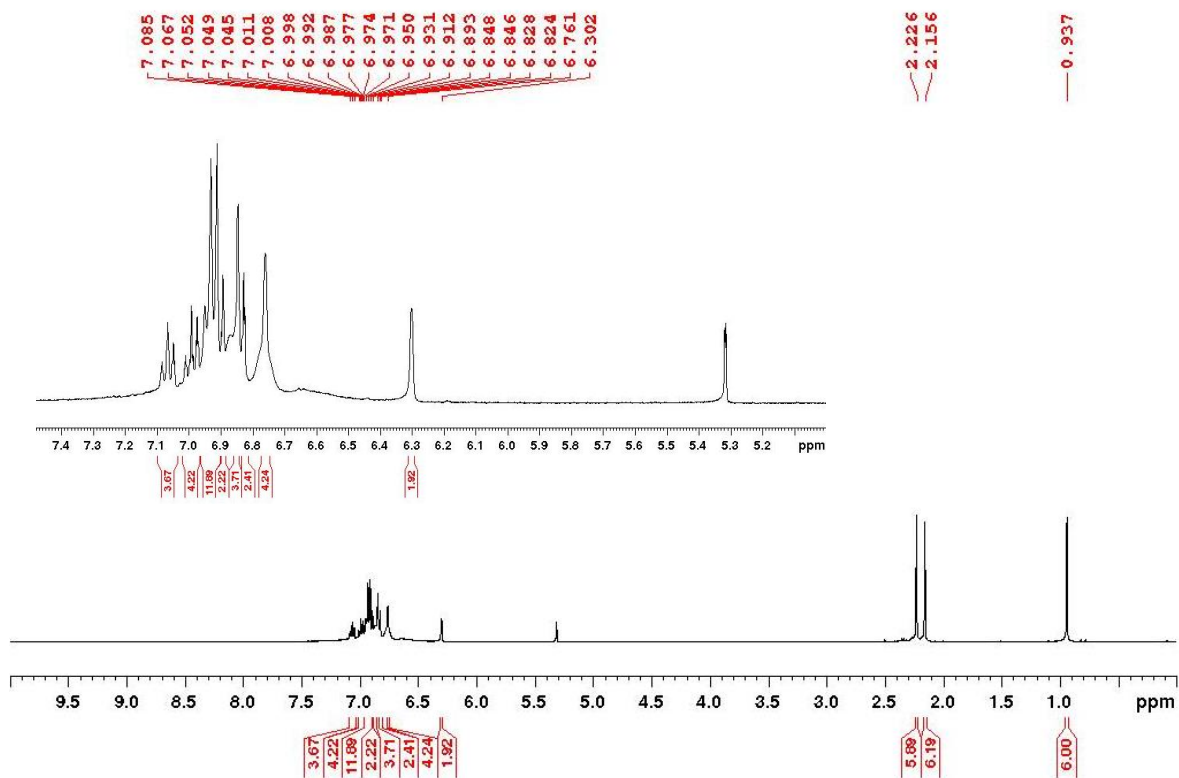

Figure S1.  $^1\text{H}$  NMR spectrum of 2

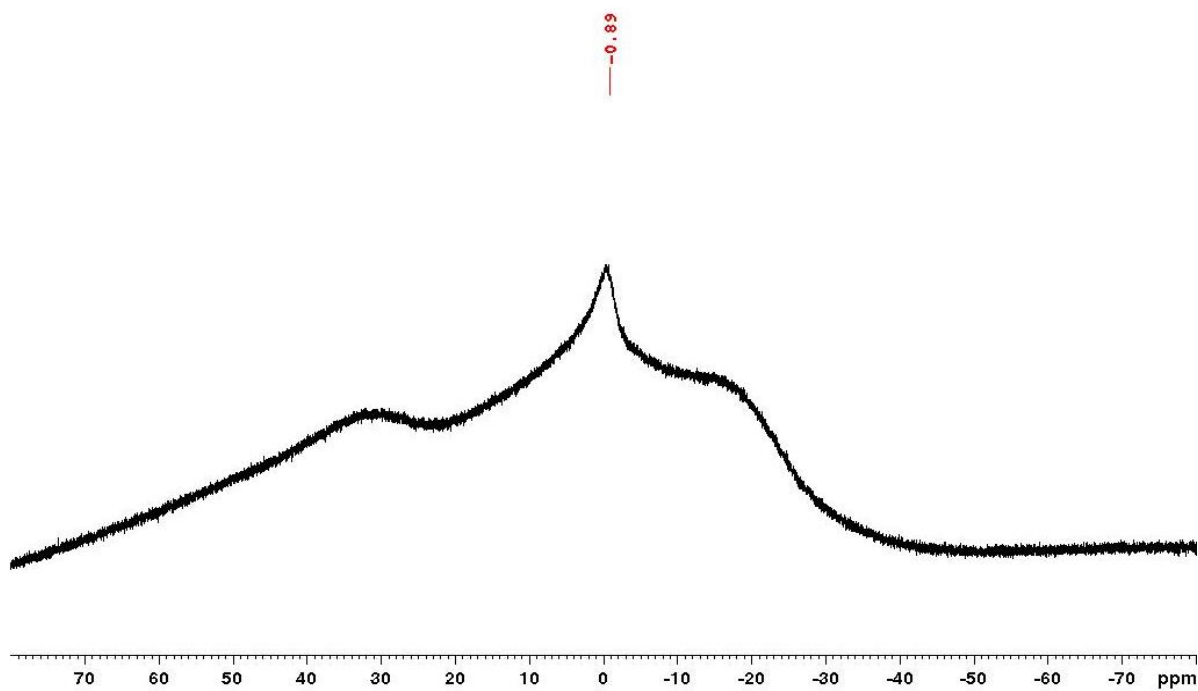

Figure S2.  $^{11}\text{B}$  NMR spectrum of 2

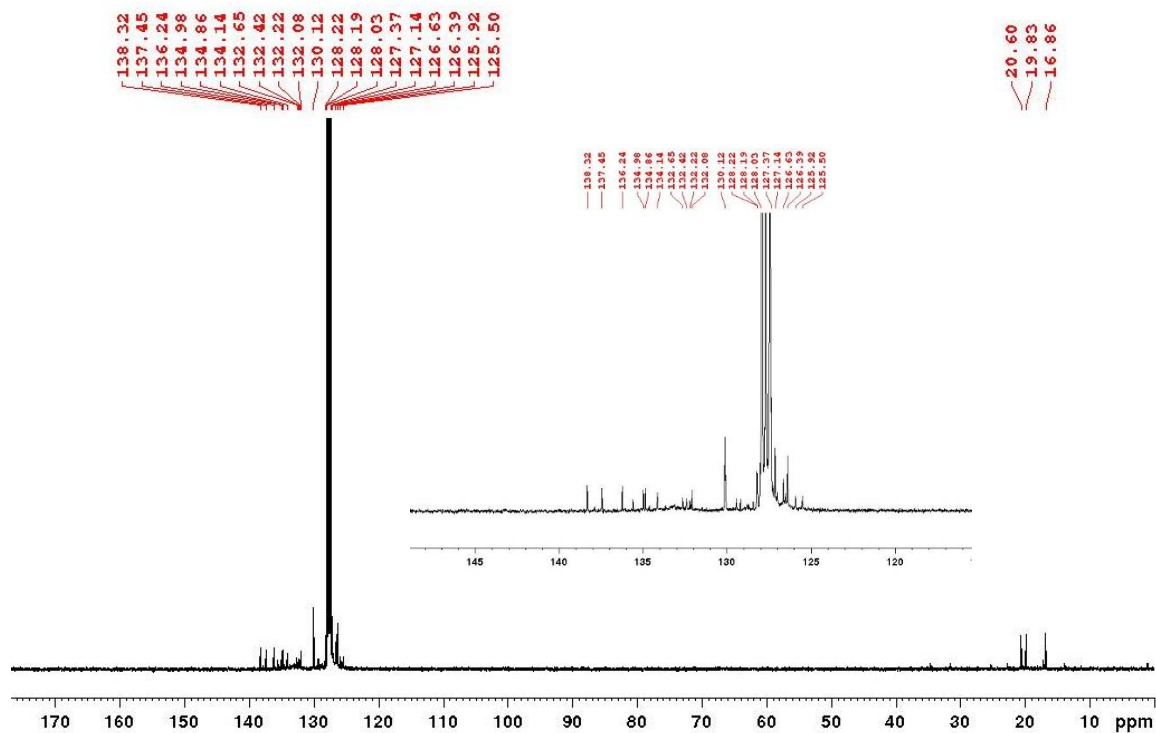

Figure S3.  $^{13}\text{C}$  NMR spectrum of **2**

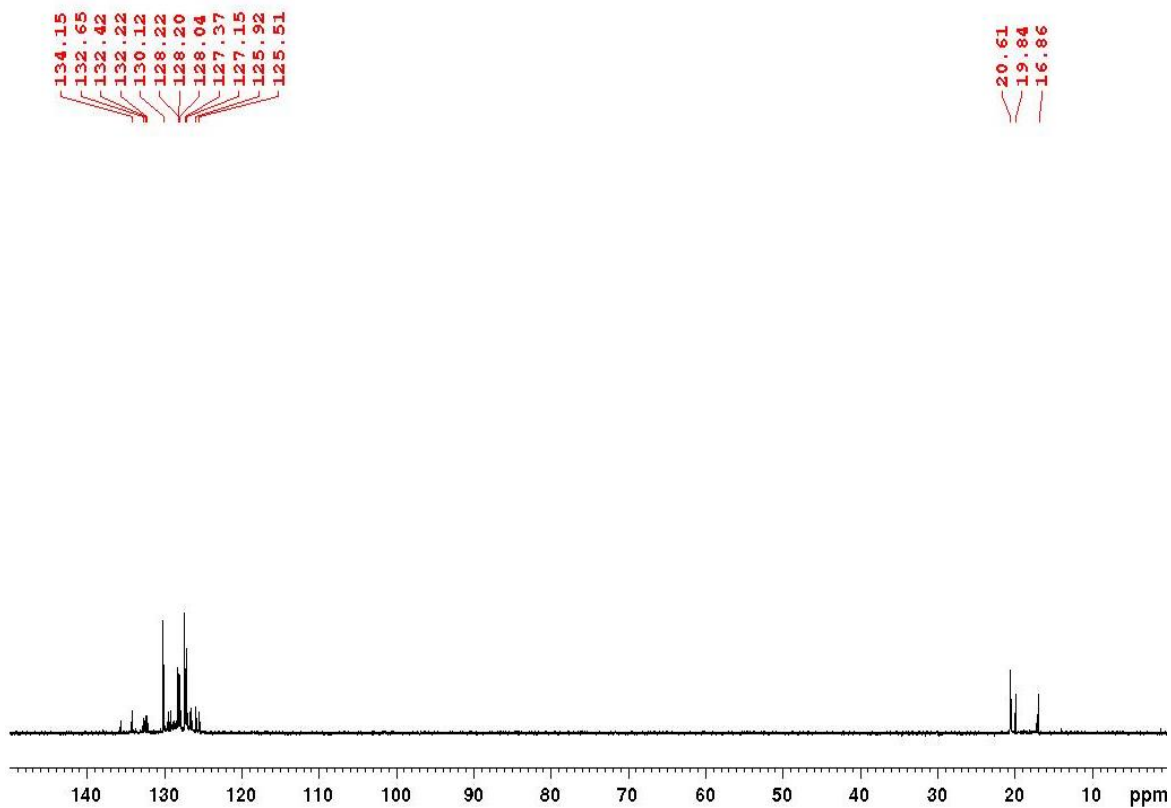

Figure S4.  $^{13}\text{C}$  NMR (DEPT 135) spectrum of **2**

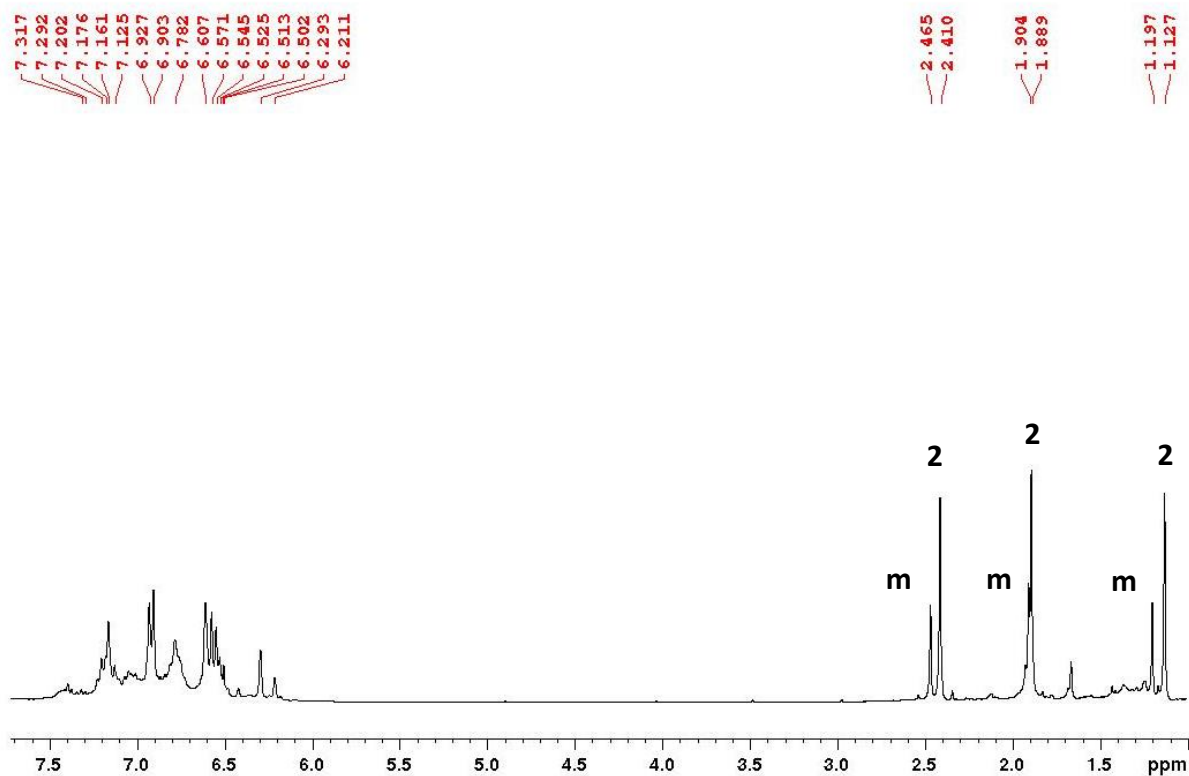

Figure S5.  $^1\text{H}$  NMR spectrum of crude mixture containing of **2** and a minor product **m** in  $\text{C}_6\text{D}_6$

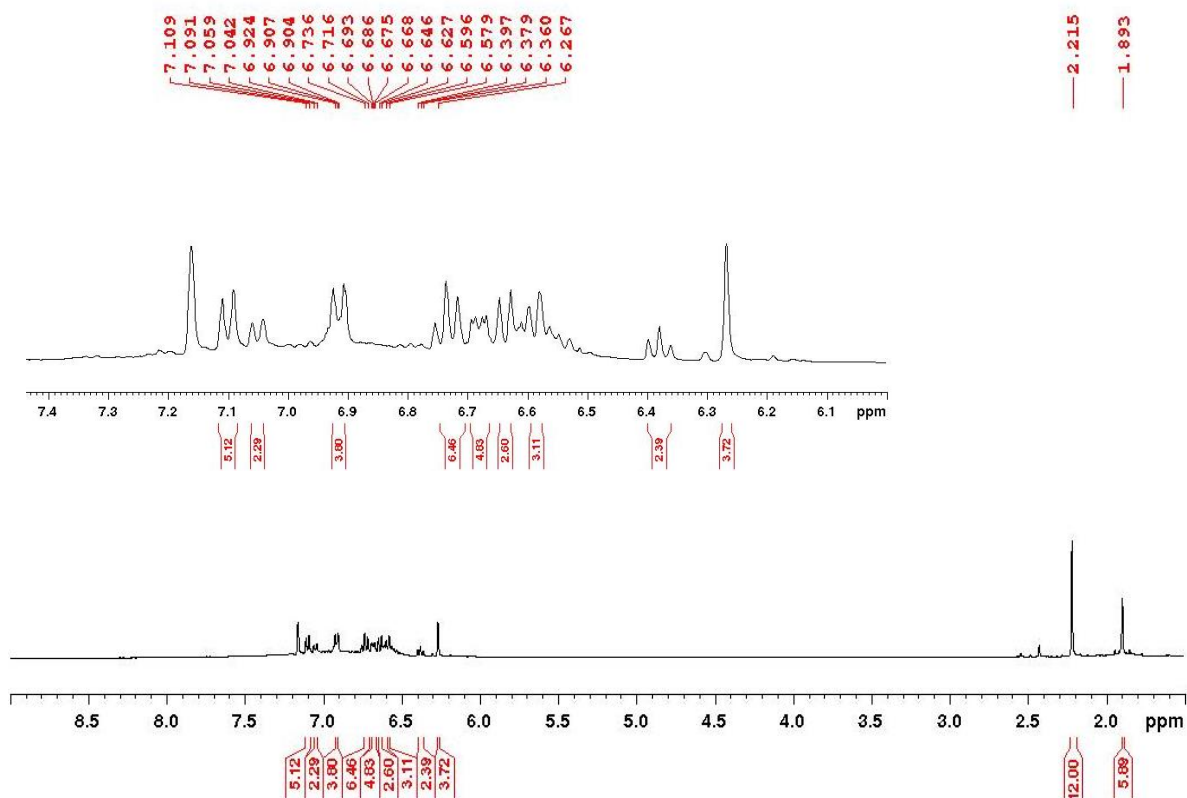

Figure S6.  $^1\text{H}$  NMR spectrum of **3**

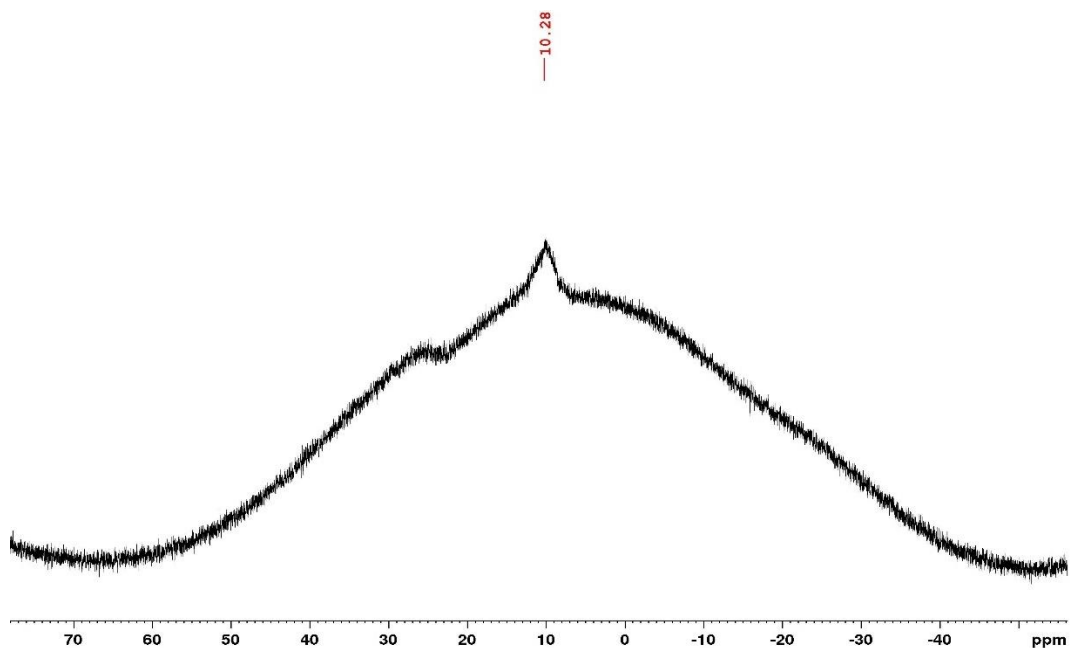

Figure S7. <sup>11</sup>B NMR spectrum of 3

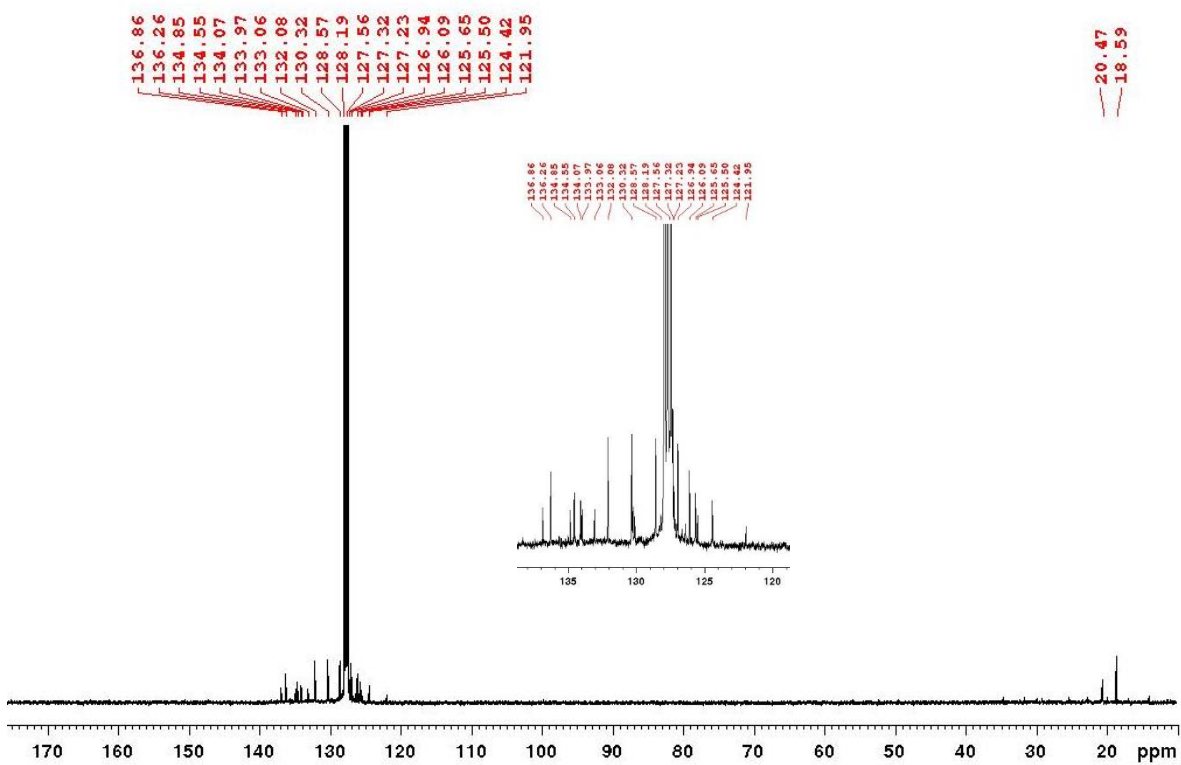

Figure S8. <sup>13</sup>C NMR spectrum of 3

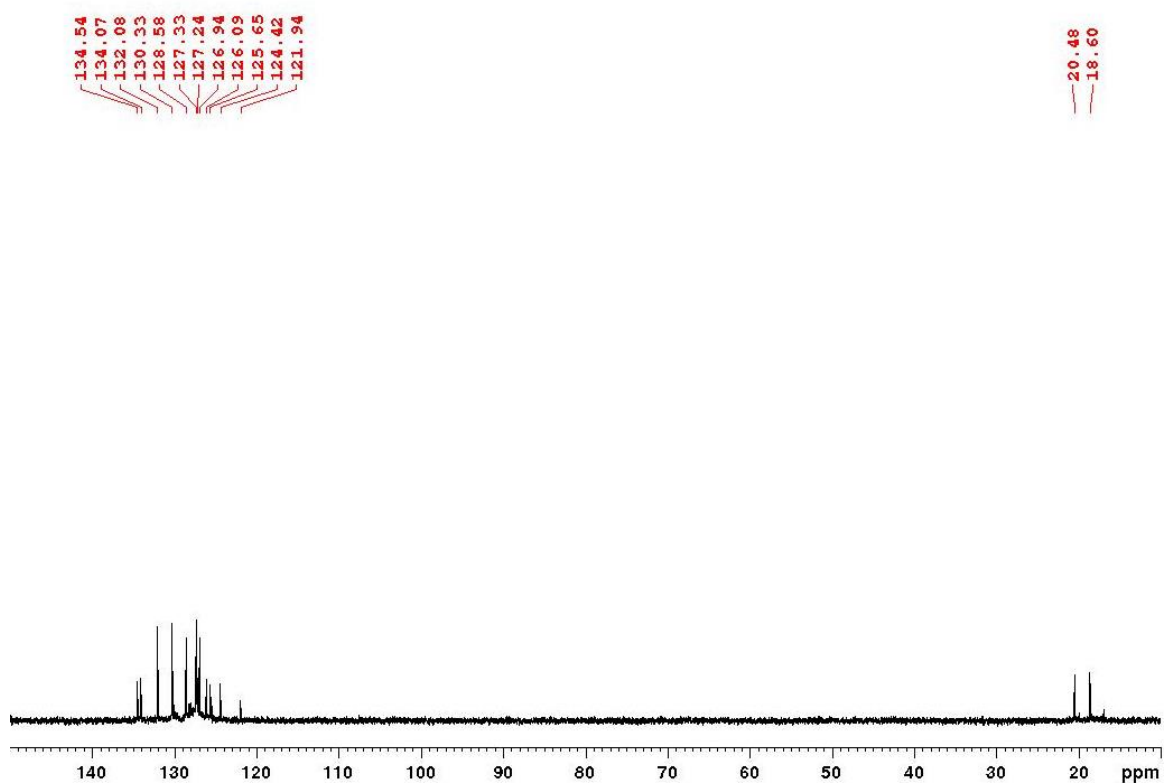

Figure S9.  $^{13}\text{C}$  NMR (DEPT 135) spectrum of **3**

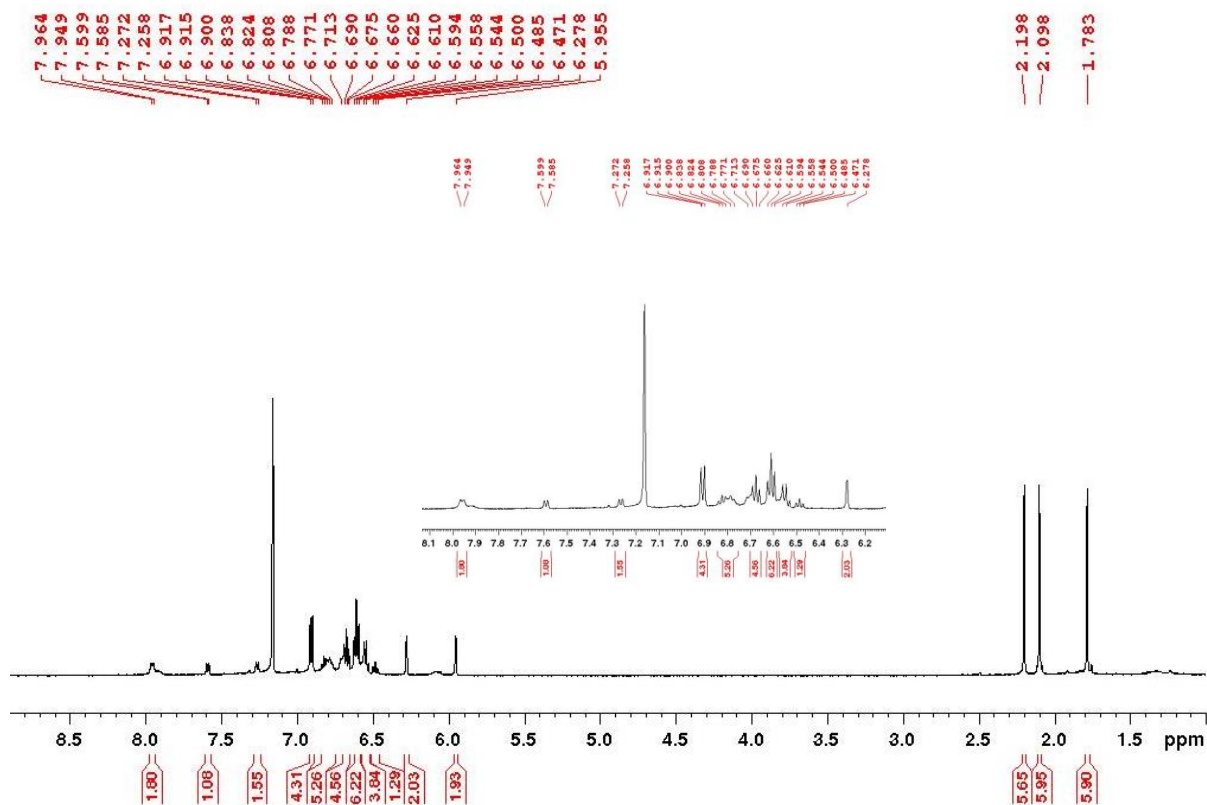

Figure S10.  $^1\text{H}$  NMR spectrum of **4**

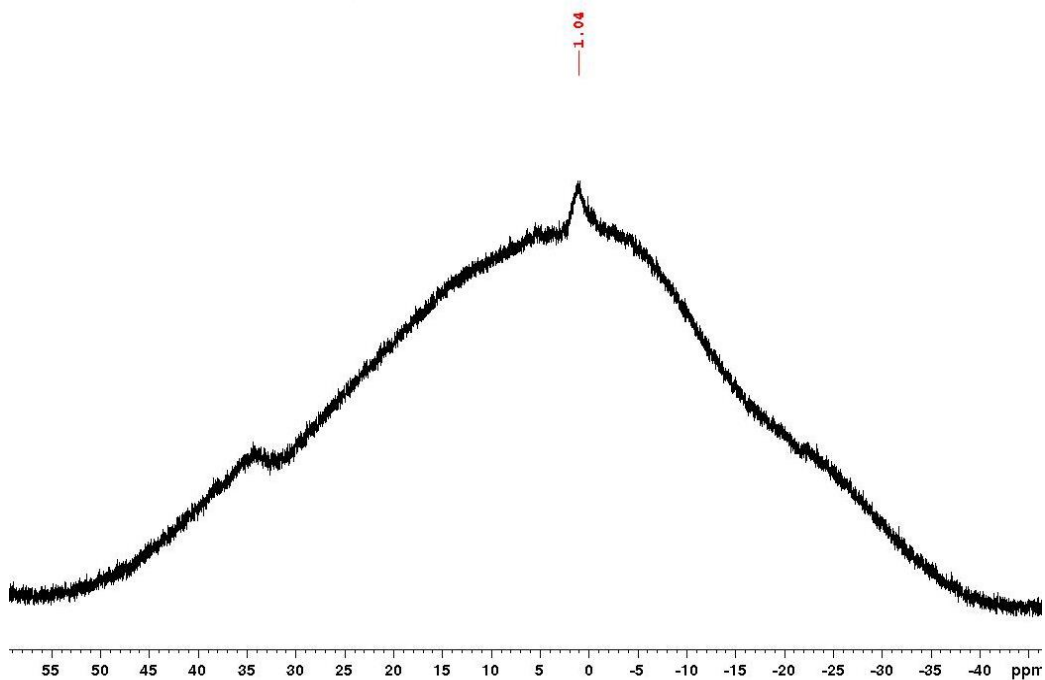

Figure S11.  $^{11}\text{B}$  NMR spectrum of **4**

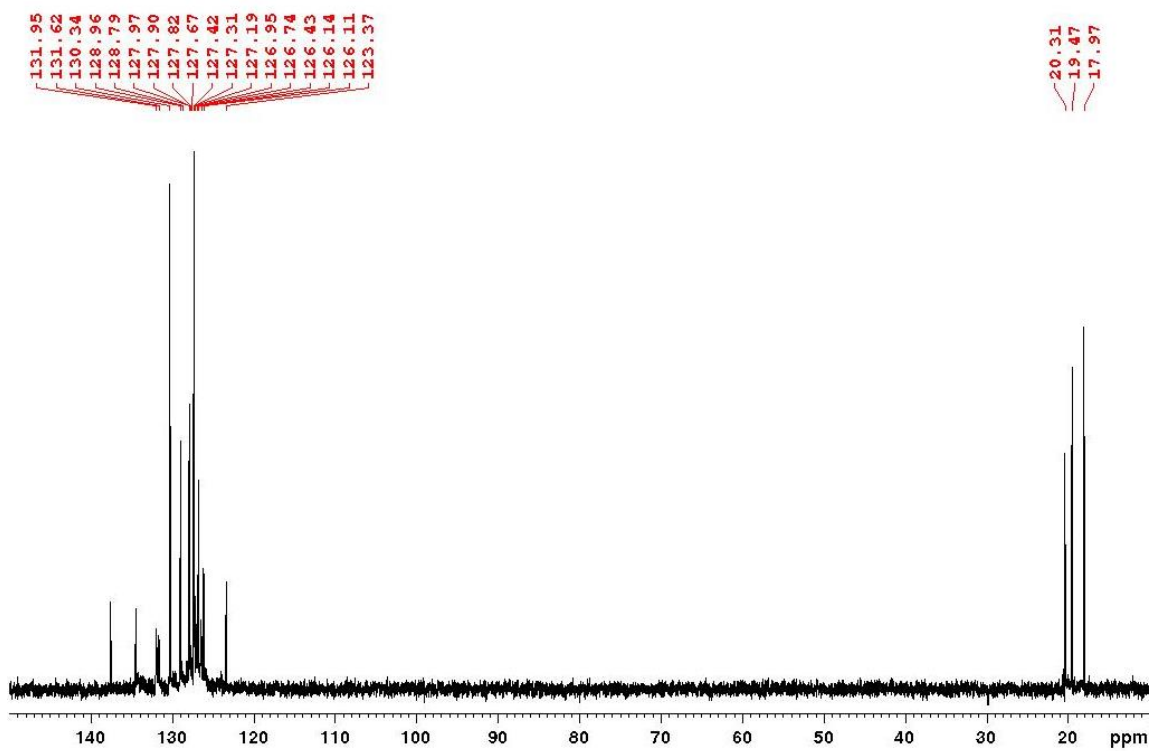

Figure S12.  $^{13}\text{C}$  NMR spectrum of **4**

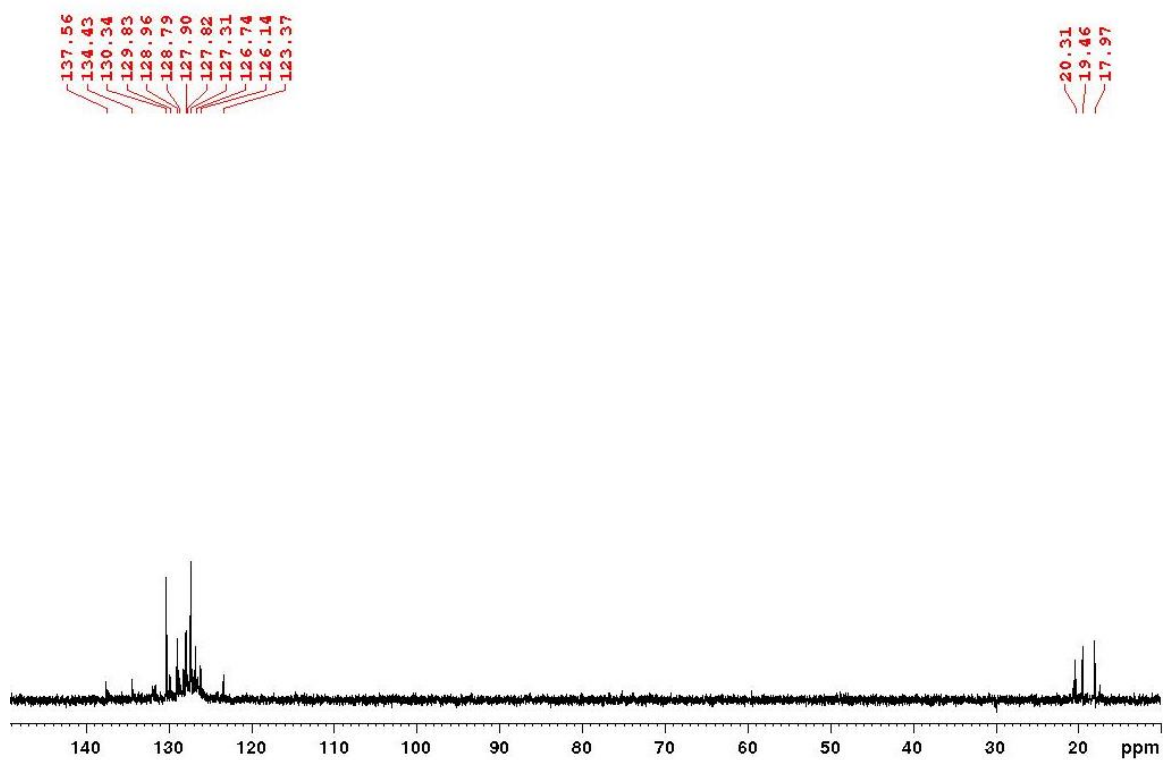

Figure S13.  $^{13}\text{C}$  NMR (DEPT 135) spectrum of **4**

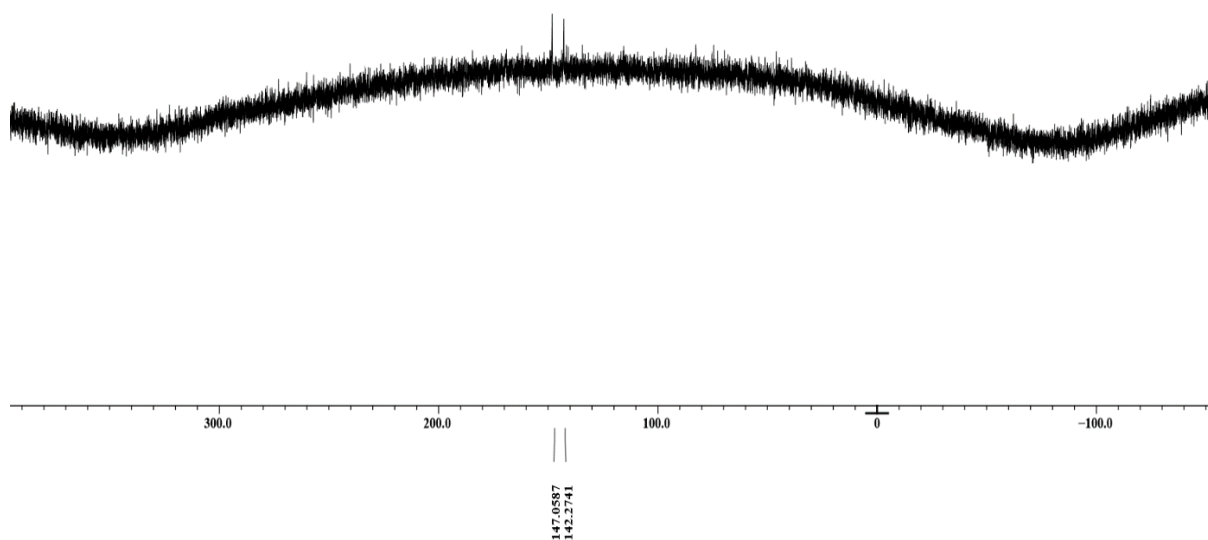

Figure S14.  $^{77}\text{Se}\{^1\text{H}\}$  NMR spectrum of **4** (\*presence of two peaks is putatively due to inequivalent selenium atoms in Se NMR time scale, as predicted by X-ray diffractometry and DFT studies: see Table S3)



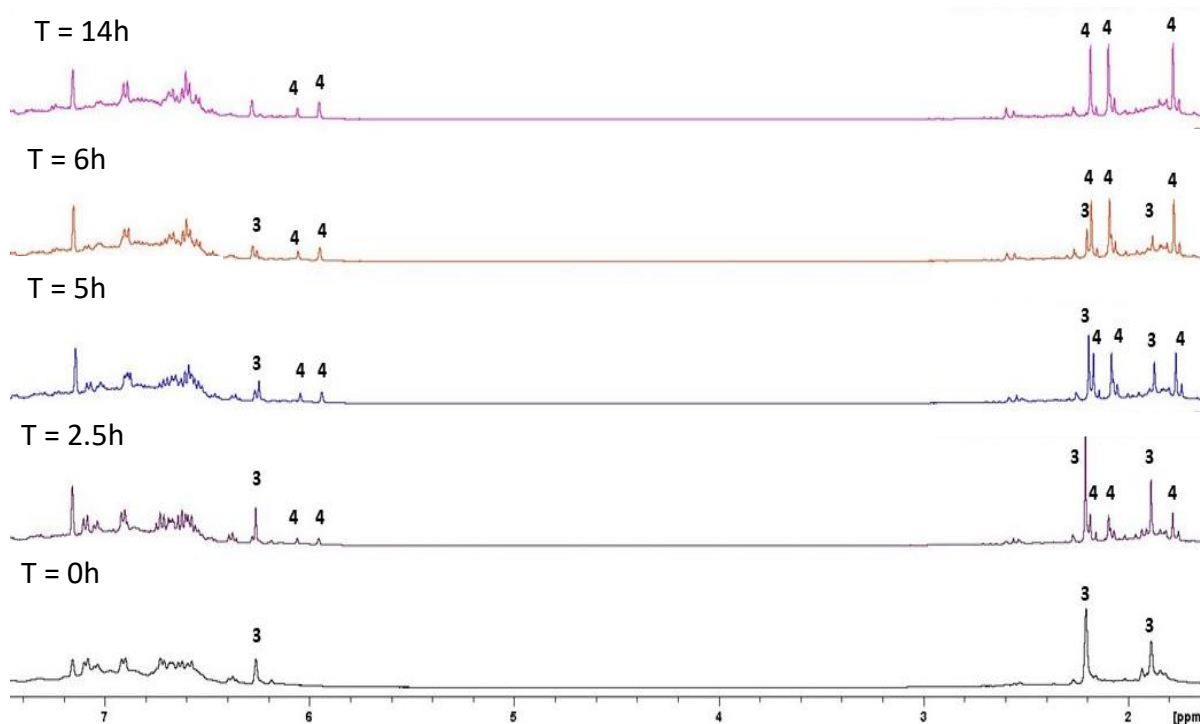

**Figure S15.**  $^1\text{H}$  NMR spectrum in monitoring the formation of **4** during the reaction of **3** with Se at  $80\text{ }^\circ\text{C}$ .

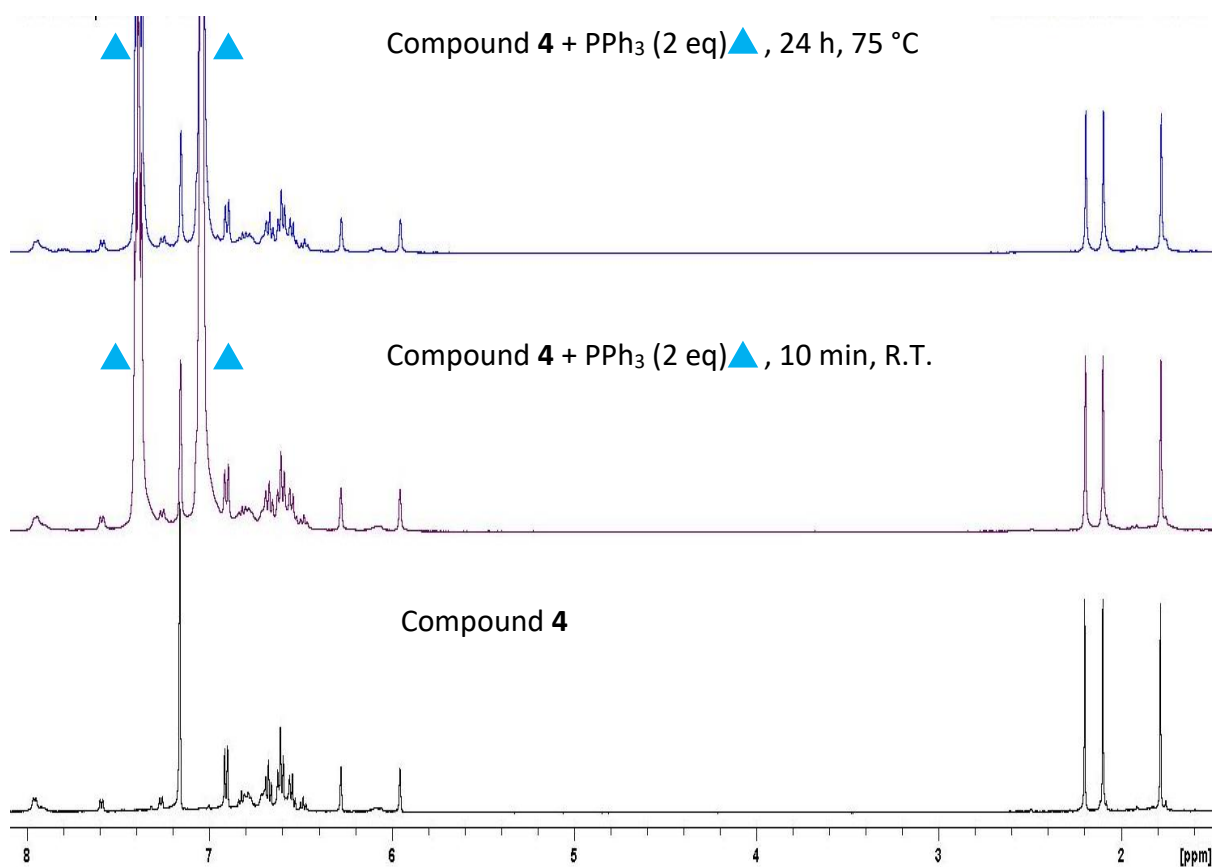

**Figure S16.**  $^1\text{H}$  NMR spectrum in monitoring of reaction of **4** and  $\text{PPh}_3$  (2 eq)

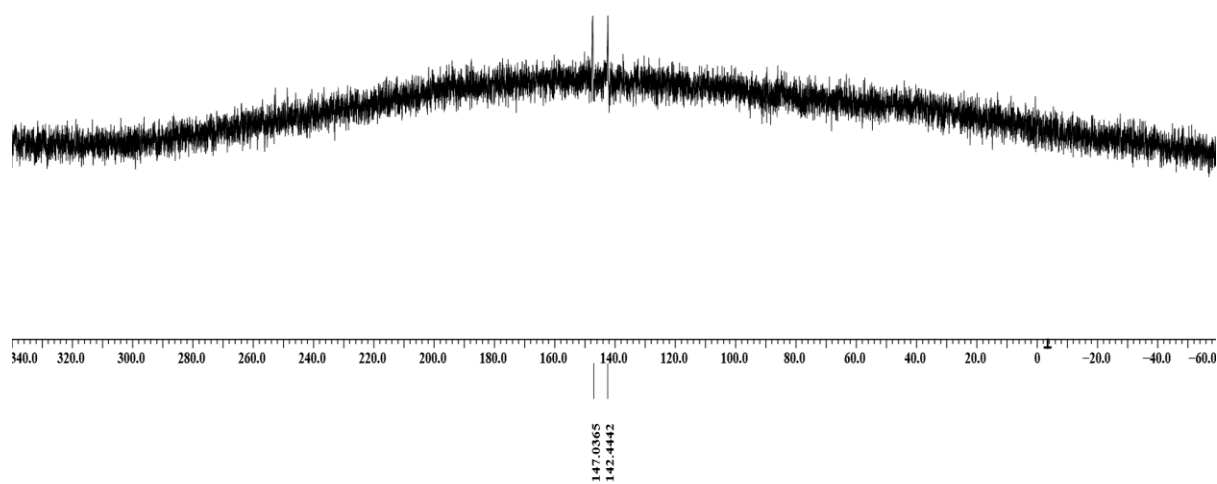

**Figure S17.**  $^{77}\text{Se}\{^1\text{H}\}$  NMR spectrum of a mixture of **4** and  $\text{PPh}_3$  after heating at 75 °C for 24 h

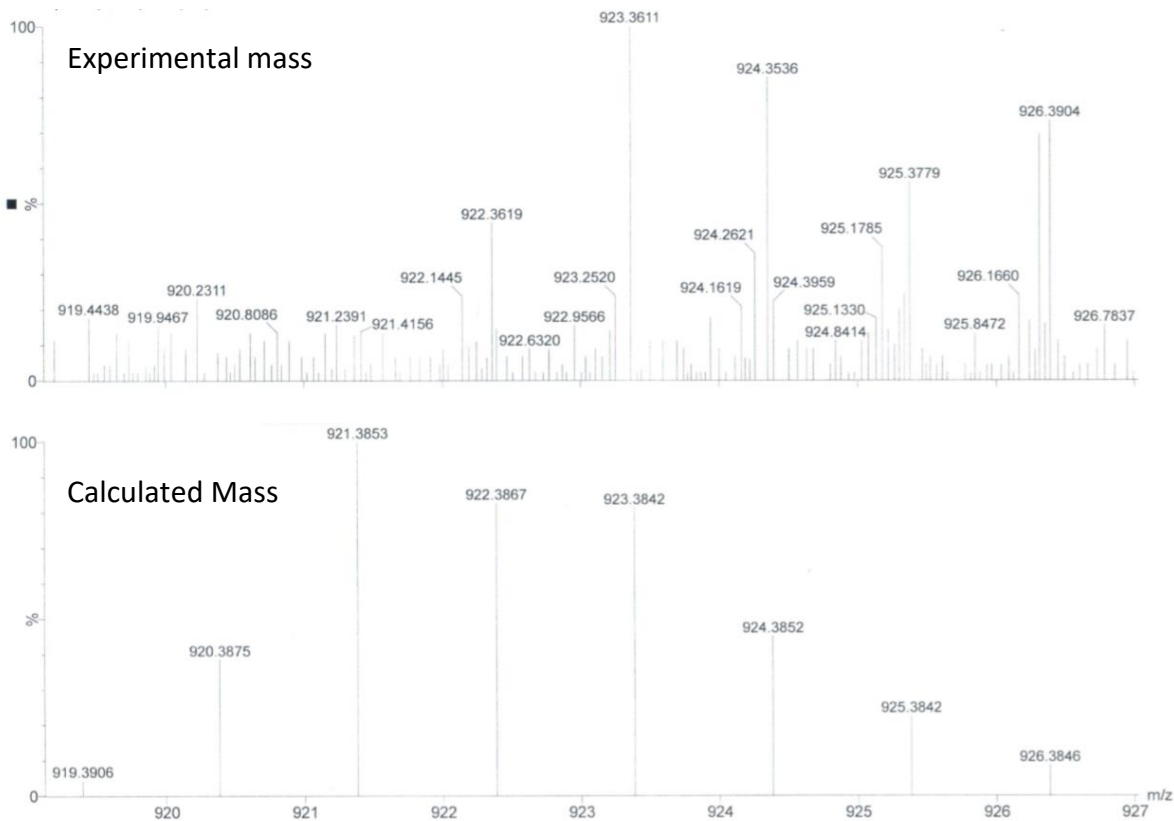

**Figure S18.** Electrospray ionization (ESI) mass spectra of compound **2** with isotopic distributions.

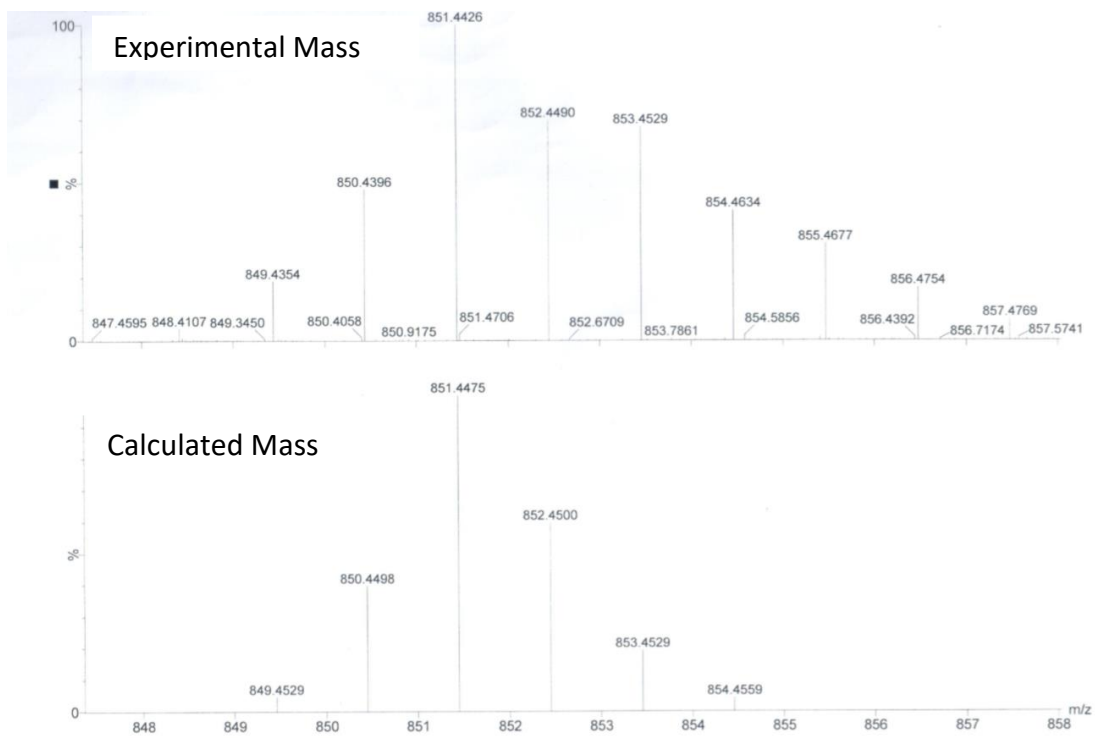

**Figure S19.** Electrospray ionization (ESI) mass spectra of compound **3** with isotopic distributions.

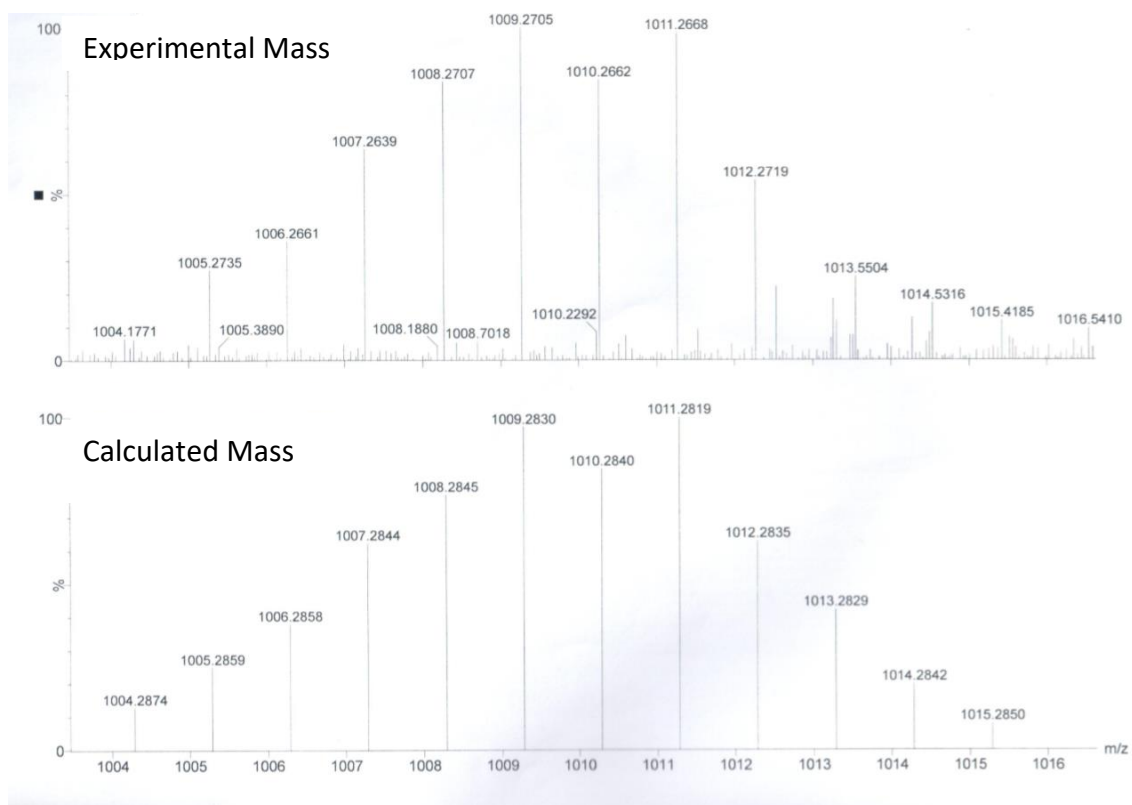

**Figure S20.** Electrospray ionization (ESI) mass spectra of compound **4** with isotopic distributions.

## 2. UV/Vis absorption spectroscopy

The UV/Vis absorption spectroscopy for compound **3** was computed with the time dependent DFT (TD-DFT) method at the B3LYP/6-311G(d,p) level.

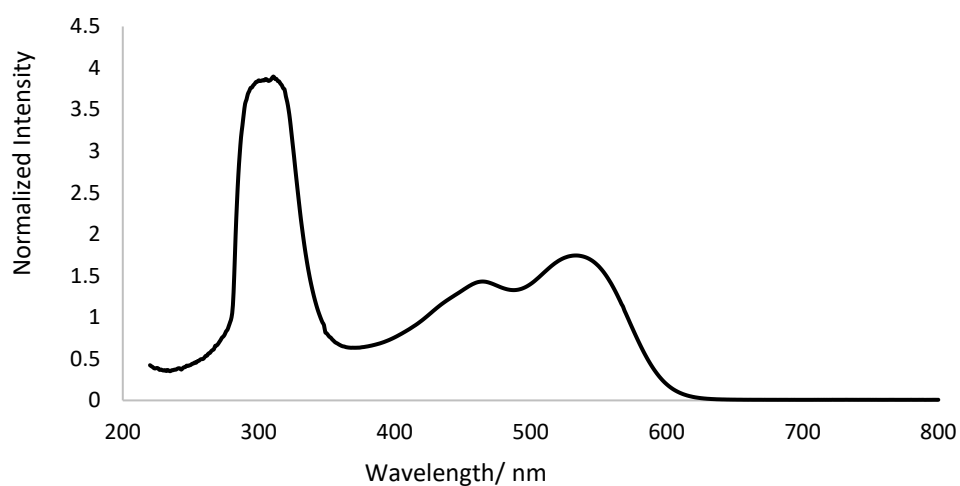

Figure S21. UV Vis absorption spectra of **3** in toluene

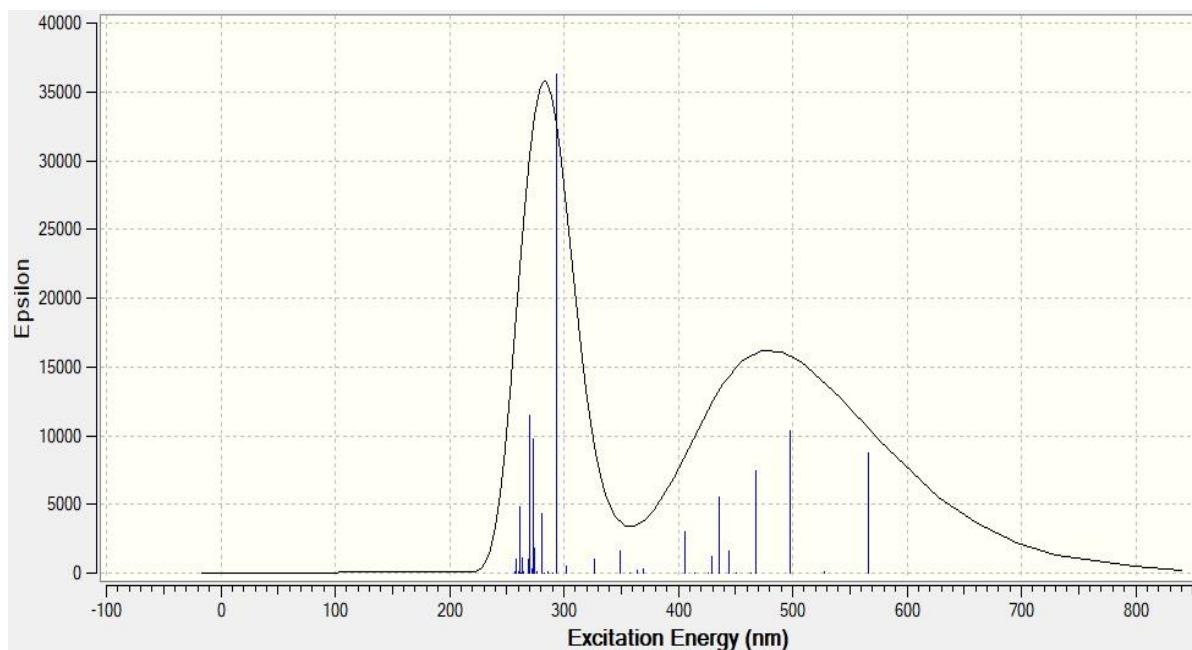

Figure S22. Calculated UV Vis absorption spectra of **3** by TD-DFT at B3LYP/6-311G(d,p) level of theory

### 3. Crystallographic data

X-ray data collection and structural refinement. Intensity data for compounds **2**, **3** and **4** were collected at 100 K using a Bruker D8 Quest diffractometer. The structure was solved by Intrinsic Phasing (SHELXTL XT-2014)<sup>[1]</sup> and refined for all data by full-matrix least squares methods on  $F^2$ .<sup>[2]</sup> All non-hydrogen atoms were subjected to anisotropic refinement. The hydrogen atoms were generated geometrically and allowed to ride in their respective parent atoms; they were assigned appropriate isotropic thermal parameters and included in the structure-factor calculations. The restraint RIGU for the whole molecule was used in the refinement of rei1167m cif. CCDC: 1902297-1902299 contains the supplementary crystallographic data for this paper. The data can be obtained free of charge from the Cambridge Crystallography Data Center via [www.ccdc.cam.ac.uk/data\\_request/cif](http://www.ccdc.cam.ac.uk/data_request/cif)

**Table S1.** Summary of Data collection and structure refinement for compounds **2,3** and **4**.

|                                            | <b>2</b>                                                                      | <b>3</b>                                                      | <b>4</b>                                                                      |
|--------------------------------------------|-------------------------------------------------------------------------------|---------------------------------------------------------------|-------------------------------------------------------------------------------|
| Formula                                    | C <sub>66</sub> H <sub>58</sub> B <sub>2</sub> Cl <sub>2</sub> N <sub>4</sub> | C <sub>60</sub> H <sub>52</sub> B <sub>2</sub> N <sub>4</sub> | C <sub>60</sub> H <sub>52</sub> B <sub>2</sub> N <sub>4</sub> Se <sub>2</sub> |
| Fw                                         | 999.68                                                                        | 850.67                                                        | 1008.59                                                                       |
| Cryst syst                                 | triclinic                                                                     | triclinic                                                     | triclinic                                                                     |
| Space group                                | P -1                                                                          | P -1                                                          | P -1                                                                          |
| Size (mm <sup>3</sup> )                    | 0.100 x 0.140<br>x 0.160                                                      | 0.040 x 0.220<br>x 0.240                                      | 0.020 x 0.100 x<br>0.120                                                      |
| T/K                                        | 100(2)                                                                        | 100(2)                                                        | 100(2)                                                                        |
| <i>a</i> , Å                               | 8.0320(2)                                                                     | 12.2084(6)                                                    | 13.734(6)                                                                     |
| <i>b</i> , Å                               | 12.9483(3)                                                                    | 14.2682(8)                                                    | 14.180(5)                                                                     |
| <i>c</i> , Å                               | 13.2734(3)                                                                    | 15.0075(8)                                                    | 15.375(6)                                                                     |
| $\alpha$ , deg                             | 93.7410(9)                                                                    | 114.4228(17)                                                  | 65.974(7)                                                                     |
| $\beta$ , deg                              | 92.4577(8)                                                                    | 98.0538(17)                                                   | 75.771(9)                                                                     |
| $\gamma$ , deg                             | 104.6101(9)                                                                   | 90.2251(18)                                                   | 62.708(8)                                                                     |
| <i>V</i> , Å <sup>3</sup>                  | 1330.44(5)                                                                    | 2351.2(2)                                                     | 2423.9(17)                                                                    |
| <i>Z</i>                                   | 1                                                                             | 2                                                             | 2                                                                             |
| <i>d</i> calcd g.cm <sup>-3</sup>          | 1.248                                                                         | 1.202                                                         | 2423.9(17)                                                                    |
| $\mu$ , mm <sup>-1</sup>                   | 0.169                                                                         | 0.069                                                         | 1.571                                                                         |
| Refl collected                             | 55990                                                                         | 26578                                                         | 18578                                                                         |
| T <sub>max</sub> /T <sub>min</sub>         | 0.9830/0.9740                                                                 | 0.9970/0.984                                                  | 0.9690/0.8340                                                                 |
| N <sub>measd</sub>                         | 8530                                                                          | 10210                                                         | 8527                                                                          |
| [R int]                                    | 0.0564                                                                        | 0.1030                                                        | 0.1418                                                                        |
| R [ <i>I</i> >2 $\sigma$ ( <i>I</i> )]     | 0.0468                                                                        | 0.0665                                                        | 0.0959                                                                        |
| Rw [ <i>I</i> >2 $\sigma$ ( <i>I</i> )]    | 0.0702                                                                        | 0.1403                                                        | 0.2213                                                                        |
| GOF                                        | 1.026                                                                         | 1.035                                                         | 1.026                                                                         |
| Largest diff peak/hole[e·Å <sup>-3</sup> ] | 0.363/-0.260                                                                  | 0.258/-0.301                                                  | 0.812/-0.873                                                                  |

#### 4. Computational details

Gaussian 09E was used for the density functional theory (DFT) calculations.<sup>3</sup> Geometry optimization and frequency calculations of compounds **2**, **3** and **4** were performed at the B3LYP/6-311G(d,p) level of theory. NBO calculations for compounds **2**, **3** and **4** were performed at B3LYP/6-311G(d,p) level.<sup>4</sup> NMR shielding tensors for compounds **2**, **3** and **4** were computed with the Gauge-Independent Atomic Orbital (GIAO) method at the B3LYP/6-311G(d,p) level. The calculated boron chemical shifts were derived with reference to that of BF<sub>3</sub>·Et<sub>2</sub>O.



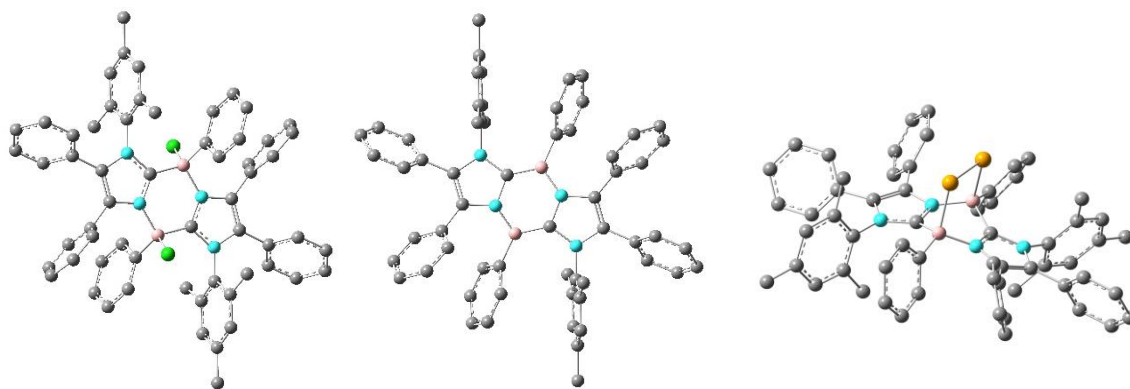

**Figure S23.** The optimized structures of **2** (left), **3** (center) and **4** (right).

**Table S2.** Selected Bond Lengths and Wiberg Bond Index (WBI) for the optimized geometries of compound **3**.

| Bond (Å) | X-ray data | Optimized structure | WBI Value |
|----------|------------|---------------------|-----------|
| B1-N1    | 1.457(4)   | 1.4574              | 0.9144    |
| B1-C1    | 1.496(4)   | 1.4960              | 1.1868    |
| B2-N3    | 1.462(4)   | 1.4624              | 0.9144    |
| B2-C2    | 1.494(4)   | 1.4942              | 1.1867    |
| N3-C1    | 1.407(3)   | 1.4073              | 1.1223    |
| N1-C2    | 1.406(3)   | 1.4058              | 1.1223    |

**Table S3.** Selected Bond Lengths and Wilberg Bond Index (WBI) for the optimized geometries of compound **4**.

| Bond (Å) | X-ray data | Optimized structure | WBI Value |
|----------|------------|---------------------|-----------|
| B1-N3    | 1.577(13)  | 1.5775              | 0.6503    |
| B1-C2    | 1.588(15)  | 1.5876              | 0.8489    |
| B2-N1    | 1.566(13)  | 1.5656              | 0.6503    |
| B2-C1    | 1.600(15)  | 1.6004              | 0.8489    |
| N1-C2    | 1.334(11)  | 1.3342              | 1.2873    |
| N3-C1    | 1.357(12)  | 1.3573              | 1.2873    |
| B1-Se1   | 2.114(12)  | 2.1139              | 0.8674    |
| B2-Se2   | 2.114(13)  | 2.1144              | 0.8674    |
| Se1-Se2  | 2.3543(18) | 2.3543              | 0.5955    |

**Table S4:** Optimized structures of a) **2** b) **3** and c) **4**. (atom, x-, y-, z- positions in Å).

a) **2**

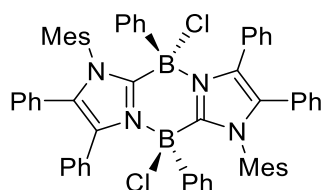

|    |             |             |             |
|----|-------------|-------------|-------------|
| C  | -2.44374100 | 6.04444400  | -1.14257100 |
| H  | -2.53937300 | 7.10123400  | -1.36643100 |
| H  | -2.27895100 | 6.34159600  | 0.98311400  |
| C  | -2.46303300 | 5.10678900  | -2.17278600 |
| C  | -2.29998500 | 5.61883700  | 0.17545600  |
| C  | -2.34090500 | 3.75110600  | -1.88486500 |
| H  | -2.57250300 | 5.42964300  | -3.20195900 |
| C  | -2.17546000 | 4.26243100  | 0.46350600  |
| C  | -2.19263400 | 3.31391200  | -0.56372700 |
| H  | -2.34943500 | 3.02319400  | -2.68651400 |
| H  | -2.04818500 | 3.93893900  | 1.48902200  |
| C  | -2.16885400 | 1.85585100  | -0.27363600 |
| C  | -3.27018500 | 1.05869600  | -0.14790400 |
| N  | -1.04265500 | 1.02883000  | -0.16347300 |
| C  | -4.69902700 | 1.44113300  | -0.16496800 |
| N  | -2.80352400 | -0.24927700 | 0.02528400  |
| B  | 0.45315700  | 1.52314600  | -0.21161300 |
| C  | -1.43873400 | -0.24310500 | 0.02002600  |
| C  | -5.19107400 | 2.33126900  | 0.79894300  |
| C  | -5.57717900 | 0.96409300  | -1.14613900 |
| C  | -3.68489400 | -1.37413600 | 0.27035900  |
| C  | 1.43873500  | 0.24313000  | -0.02002200 |
| C  | 0.67095800  | 2.65435200  | 0.92349400  |
| Cl | 0.73421500  | 2.17858500  | -1.99610100 |
| B  | -0.45315600 | -1.52312000 | 0.21161900  |

|    |             |             |             |
|----|-------------|-------------|-------------|
| H  | -4.52195400 | 2.71397900  | 1.55922700  |
| C  | -6.52539700 | 2.72742200  | 0.78628300  |
| C  | -6.91156800 | 1.35832500  | -1.15607800 |
| H  | -5.21193600 | 0.29686400  | -1.91485100 |
| C  | -4.11958200 | -2.16421500 | -0.79951200 |
| C  | -4.15258100 | -1.58438200 | 1.58099300  |
| N  | 1.04265000  | -1.02880100 | 0.16348600  |
| N  | 2.80352600  | 0.24928400  | -0.02529700 |
| C  | 0.27329400  | 2.36775500  | 2.24151500  |
| C  | 1.20859500  | 3.92338400  | 0.67877800  |
| H  | 2.74086800  | 0.39332100  | -2.71164200 |
| H  | 1.51820700  | 4.18006100  | -0.32702200 |
| C  | -0.67092900 | -2.65433200 | -0.92348600 |
| Cl | -0.73421000 | -2.17856100 | 1.99610600  |
| H  | -6.88708300 | 3.41781500  | 1.53983800  |
| C  | -7.39084700 | 2.23917400  | -0.18927200 |
| H  | -7.57585500 | 0.98059200  | -1.92511800 |
| C  | -3.72243300 | -1.91972500 | -2.23414000 |
| C  | -4.98922900 | -3.22412700 | -0.51939400 |
| C  | -5.01285100 | -2.65578700 | 1.80343200  |
| C  | -3.79640200 | -0.66175000 | 2.71895500  |
| C  | 2.16883600  | -1.85582900 | 0.27368500  |
| C  | 3.27017400  | -1.05869400 | 0.14788600  |
| C  | 3.68490900  | 1.37412500  | -0.27039800 |
| H  | -0.14221200 | 1.39160400  | 2.47663500  |
| C  | 0.38944000  | 3.30722500  | 3.26409900  |
| C  | 1.33334300  | 4.86920500  | 1.69584600  |
| C  | 3.79637400  | 0.66168400  | -2.71898000 |
| C  | -0.27320900 | -2.36775100 | -2.24149300 |
| C  | -1.20857400 | -3.92336300 | -0.67877700 |
| H  | -2.74088100 | -0.39344200 | 2.71168900  |
| H  | -1.51822500 | -4.18002900 | 0.32701300  |

|   |             |             |             |
|---|-------------|-------------|-------------|
| H | -8.43046900 | 2.54655300  | -0.19925000 |
| H | -3.13664800 | -1.01122300 | -2.36271600 |
| H | -4.61598800 | -1.84408900 | -2.86176700 |
| H | -3.12623800 | -2.75098400 | -2.61422100 |
| H | -5.32497000 | -3.84792000 | -1.34225900 |
| C | -5.43426700 | -3.49611500 | 0.76942500  |
| H | -5.36942100 | -2.83427100 | 2.81307500  |
| H | -4.38469400 | 0.25977400  | 2.66373600  |
| H | -4.01425500 | -1.13866100 | 3.67582900  |
| C | 2.19257800  | -3.31387800 | 0.56383500  |
| C | 4.69901400  | -1.44114000 | 0.16491900  |
| C | 4.11963600  | 2.16420900  | 0.79945400  |
| C | 4.15258400  | 1.58433400  | -1.58104200 |
| H | 0.06962500  | 3.05565000  | 4.27010900  |
| C | 0.91999500  | 4.56824900  | 2.99224900  |
| H | 1.74584700  | 5.84750900  | 1.47205400  |
| H | 4.38471900  | -0.25980900 | -2.66380100 |
| H | 4.01413500  | 1.13860500  | -3.67586800 |
| H | 0.14231200  | -1.39160300 | -2.47660400 |
| C | -0.38931500 | -3.30723100 | -3.26407300 |
| C | -1.33328000 | -4.86919300 | -1.69584100 |
| C | -6.34377000 | -4.66673200 | 1.05331800  |
| C | 2.34076500  | -3.75103000 | 1.88499700  |
| C | 2.17540200  | -4.26243400 | -0.46336400 |
| C | 5.19105500  | -2.33123500 | -0.79903200 |
| C | 5.57717300  | -0.96413800 | 1.14610200  |
| C | 3.72252500  | 1.91974300  | 2.23409700  |
| C | 4.98930200  | 3.22409700  | 0.51930300  |
| C | 5.01287800  | 2.65571200  | -1.80351300 |
| H | 1.01098500  | 5.30604500  | 3.78244100  |
| H | -0.06945800 | -3.05566600 | -4.27007200 |
| C | -0.91988200 | -4.56825100 | -2.99223000 |

|   |             |             |             |
|---|-------------|-------------|-------------|
| H | -1.74579400 | -5.84749500 | -1.47205500 |
| H | -6.79691100 | -5.05147400 | 0.13748100  |
| H | -7.14783400 | -4.38851000 | 1.73978700  |
| H | -5.78851700 | -5.48770100 | 1.51928100  |
| H | 2.34928200  | -3.02308900 | 2.68662000  |
| C | 2.46283400  | -5.10670700 | 2.17297100  |
| C | 2.29986600  | -5.61883300 | -0.17526000 |
| H | 2.04816500  | -3.93897400 | -1.48889400 |
| H | 4.52193100  | -2.71391200 | -1.55933000 |
| C | 6.52537900  | -2.72738800 | -0.78639900 |
| C | 6.91156300  | -1.35837000 | 1.15601700  |
| H | 5.21193400  | -0.29694100 | 1.91484400  |
| H | 3.13662800  | 1.01131600  | 2.36268500  |
| H | 4.61610000  | 1.84397900  | 2.86168100  |
| H | 3.12645800  | 2.75107500  | 2.61422100  |
| H | 5.32507000  | 3.84789700  | 1.34215300  |
| C | 5.43432600  | 3.49605100  | -0.76952800 |
| H | 5.36944000  | 2.83416900  | -2.81316400 |
| H | -1.01084000 | -5.30605500 | -3.78241700 |
| H | 2.57224500  | -5.42952900 | 3.20216100  |
| C | 2.44355500  | -6.04439800 | 1.14278800  |
| H | 2.27883300  | -6.34162200 | -0.98289200 |
| H | 6.88706100  | -3.41774800 | -1.53998400 |
| C | 7.39083500  | -2.23918000 | 0.18917100  |
| H | 7.57585500  | -0.98066800 | 1.92506700  |
| C | 6.34385800  | 4.66663900  | -1.05345500 |
| H | 2.53913600  | -7.10118300 | 1.36669100  |
| H | 8.43045700  | -2.54655900 | 0.19912900  |
| H | 6.79700700  | 5.05139700  | -0.13762900 |
| H | 7.14791600  | 4.38837600  | -1.73991400 |
| H | 5.78862400  | 5.48760600  | -1.51944400 |

b) 3

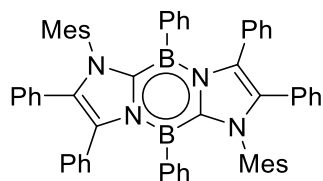

|   |             |             |             |
|---|-------------|-------------|-------------|
| B | -0.56492000 | -1.40582300 | 0.10668500  |
| B | 0.56495500  | 1.40598200  | 0.10654600  |
| C | -1.05816300 | -2.86091100 | 0.48839300  |
| C | -1.87079000 | -3.67491000 | -0.31590100 |
| H | -2.16702600 | -3.32608700 | -1.29863200 |
| C | -2.30600400 | -4.92787500 | 0.10890900  |
| H | -2.93106200 | -5.53003700 | -0.54218700 |
| C | -1.93826900 | -5.41043400 | 1.36291200  |
| H | -2.27571500 | -6.38623200 | 1.69566100  |
| C | -1.12568400 | -4.62978600 | 2.18198500  |
| H | -0.82638400 | -4.99530500 | 3.15903200  |
| C | -0.69318100 | -3.37957600 | 1.74494900  |
| H | -0.05435900 | -2.78943900 | 2.39607900  |
| C | 1.41046400  | 0.16602500  | 0.06857500  |
| C | 3.10528900  | -1.34656800 | -0.06299700 |
| C | 1.93136400  | -2.04083400 | -0.17410900 |
| C | 1.80371200  | -3.46115400 | -0.55837000 |
| C | 1.19286300  | -3.81151500 | -1.77108400 |
| H | 0.73723000  | -3.03777700 | -2.37879900 |
| C | 1.17628300  | -5.13253700 | -2.20303900 |
| H | 0.70180900  | -5.38409200 | -3.14525000 |
| C | 1.76942300  | -6.13097900 | -1.43096300 |
| H | 1.75505200  | -7.16161300 | -1.76742600 |
| C | 2.37393300  | -5.79588400 | -0.22237200 |
| H | 2.83131300  | -6.56596500 | 0.38886400  |
| C | 2.38919300  | -4.47293400 | 0.21128200  |

|   |            |             |             |
|---|------------|-------------|-------------|
| H | 2.85925800 | -4.21747400 | 1.15337000  |
| C | 4.48815900 | -1.86239900 | -0.17041500 |
| C | 4.87092000 | -2.61526700 | -1.28986200 |
| H | 4.14926800 | -2.80691900 | -2.07407500 |
| C | 6.16175600 | -3.12371000 | -1.39755700 |
| H | 6.43726700 | -3.70431200 | -2.27077100 |
| C | 7.09487600 | -2.88829700 | -0.39038700 |
| H | 8.10085000 | -3.28382700 | -0.47468400 |
| C | 6.72620200 | -2.14246200 | 0.72664800  |
| H | 7.44371600 | -1.95611500 | 1.51785200  |
| C | 5.43524300 | -1.63415200 | 0.83678100  |
| H | 5.16039600 | -1.06502500 | 1.71491700  |
| C | 3.78330100 | 1.04103000  | 0.16642500  |
| C | 4.15866700 | 1.57093200  | 1.41071500  |
| C | 5.14986600 | 2.55151300  | 1.43664600  |
| H | 5.44660500 | 2.96694500  | 2.39498300  |
| C | 5.76354500 | 3.01395400  | 0.27209000  |
| C | 5.36434800 | 2.46619300  | -0.94621900 |
| H | 5.82953200 | 2.81324500  | -1.86391900 |
| C | 4.37769200 | 1.48177700  | -1.02448600 |
| C | 3.97177300 | 0.91918400  | -2.36432000 |
| H | 4.43273200 | -0.05766000 | -2.53952600 |
| H | 4.28884400 | 1.58390400  | -3.17022100 |
| H | 2.88966800 | 0.78652400  | -2.43224600 |
| C | 6.81034200 | 4.09986200  | 0.33347300  |
| H | 7.39277500 | 4.14658400  | -0.58905100 |
| H | 7.50286400 | 3.93937300  | 1.16398800  |
| H | 6.34540700 | 5.08021300  | 0.48299100  |
| C | 3.50824300 | 1.12296500  | 2.69527300  |
| H | 3.25701700 | 0.06071700  | 2.68195100  |
| H | 2.57738300 | 1.67277700  | 2.86066100  |
| H | 4.16490000 | 1.31472000  | 3.54651400  |

|   |             |             |             |
|---|-------------|-------------|-------------|
| C | 1.05833900  | 2.86109900  | 0.48792300  |
| C | 0.69335100  | 3.38022000  | 1.74428400  |
| H | 0.05435700  | 2.79041200  | 2.39554300  |
| C | 1.12606600  | 4.63047500  | 2.18098000  |
| H | 0.82674700  | 4.99634800  | 3.15788800  |
| C | 1.93887800  | 5.41071800  | 1.36174800  |
| H | 2.27649100  | 6.38654700  | 1.69423400  |
| C | 2.30662200  | 4.92771200  | 0.10791800  |
| H | 2.93185700  | 5.52955200  | -0.54330500 |
| C | 1.87119200  | 3.67470600  | -0.31654900 |
| H | 2.16743700  | 3.32553100  | -1.29915500 |
| C | -1.41041400 | -0.16587800 | 0.06868100  |
| C | -3.10531500 | 1.34660600  | -0.06282200 |
| C | -1.93143200 | 2.04095400  | -0.17400400 |
| C | -1.80403600 | 3.46133600  | -0.55805300 |
| C | -2.39036600 | 4.47275900  | 0.21145700  |
| H | -2.86083400 | 4.21693800  | 1.15324500  |
| C | -2.37546000 | 5.79577900  | -0.22197300 |
| H | -2.83350500 | 6.56556300  | 0.38913900  |
| C | -1.77044900 | 6.13133000  | -1.43019300 |
| H | -1.75634200 | 7.16202400  | -1.76648600 |
| C | -1.17644800 | 5.13327000  | -2.20209400 |
| H | -0.70155800 | 5.38518300  | -3.14400000 |
| C | -1.19267900 | 3.81216700  | -1.77037000 |
| H | -0.73637600 | 3.03874100  | -2.37797100 |
| C | -4.48824500 | 1.86226400  | -0.17037000 |
| C | -5.43532700 | 1.63411100  | 0.83684300  |
| H | -5.16041500 | 1.06524200  | 1.71512700  |
| C | -6.72636200 | 2.14219600  | 0.72654100  |
| H | -7.44388200 | 1.95592900  | 1.51775900  |
| C | -7.09510200 | 2.88770900  | -0.39068600 |
| H | -8.10113400 | 3.28306300  | -0.47511800 |



|   |             |             |             |
|---|-------------|-------------|-------------|
| C | -6.16197700 | 3.12303400  | -1.39787500 |
| H | -6.43754700 | 3.70339200  | -2.27123200 |
| C | -4.87106800 | 2.61481800  | -1.29000500 |
| H | -4.14939400 | 2.80641500  | -2.07421500 |
| C | -3.78315400 | -1.04106200 | 0.16642700  |
| C | -4.15872700 | -1.57095600 | 1.41064800  |
| C | -5.14981700 | -2.55166000 | 1.43640000  |
| H | -5.44670900 | -2.96708500 | 2.39469300  |
| C | -5.76316200 | -3.01423400 | 0.27172800  |
| C | -5.36376000 | -2.46647200 | -0.94651900 |
| H | -5.82870200 | -2.81362500 | -1.86430100 |
| C | -4.37721900 | -1.48193200 | -1.02460600 |
| C | -3.97107500 | -0.91932000 | -2.36436300 |
| H | -4.43208300 | 0.05748100  | -2.53967200 |
| H | -4.28792700 | -1.58407600 | -3.17032200 |
| H | -2.88896800 | -0.78657500 | -2.43206900 |
| C | -6.80982800 | -4.10028000 | 0.33293200  |
| H | -6.34481900 | -5.08048100 | 0.48320200  |
| H | -7.39166600 | -4.14751100 | -0.58993700 |
| H | -7.50290900 | -3.93953100 | 1.16293700  |
| C | -3.50862200 | -1.12290500 | 2.69534000  |
| H | -2.57785500 | -1.67278800 | 2.86104200  |
| H | -4.16552600 | -1.31451900 | 3.54641900  |
| H | -3.25729500 | -0.06068600 | 2.68198500  |
| N | 0.86510800  | -1.12065700 | -0.03759700 |
| N | 2.79952200  | -0.00510200 | 0.11351300  |
| N | -0.86510100 | 1.12082800  | -0.03757000 |
| N | -2.79946800 | 0.00517500  | 0.11369600  |

c) **4**

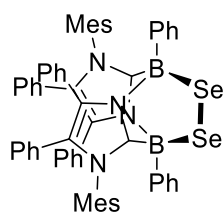

|   |             |             |             |
|---|-------------|-------------|-------------|
| B | 0.50740000  | 1.39855600  | 0.45301000  |
| B | -0.50730800 | -1.39859100 | 0.45303400  |
| C | 1.04333400  | 2.87093600  | 0.09877500  |
| C | 0.78056000  | 3.43331800  | -1.16090000 |
| H | 0.19111900  | 2.87523000  | -1.88172900 |
| C | 1.22372500  | 4.70558900  | -1.51118400 |
| H | 0.98958100  | 5.10884000  | -2.49082600 |
| C | 1.95306700  | 5.46477200  | -0.59940000 |
| H | 2.29330900  | 6.46057600  | -0.86237600 |
| C | 2.23220800  | 4.93291900  | 0.65645600  |
| H | 2.79577800  | 5.51310400  | 1.37958000  |
| C | 1.78276300  | 3.65790400  | 0.99324800  |
| H | 2.01364300  | 3.27505300  | 1.98204500  |
| C | 1.41686300  | 0.15444100  | -0.04497300 |
| C | 2.06720100  | -1.99552700 | -0.08279600 |
| C | 3.17266300  | -1.22879500 | -0.33805200 |
| C | 3.65474600  | 1.19976000  | -0.60952600 |
| C | 3.71223700  | 1.70303100  | -1.91786900 |
| C | 4.64395000  | 2.70182100  | -2.19488800 |
| H | 4.69453700  | 3.10342300  | -3.20216300 |
| C | 5.50826800  | 3.19578800  | -1.21639800 |
| C | 5.43247400  | 2.65417600  | 0.06500600  |
| H | 6.10185900  | 3.01976500  | 0.83742700  |
| C | 4.51849500  | 1.65135200  | 0.39542400  |
| C | 4.49571800  | 1.07655000  | 1.78875100  |

|   |            |             |             |
|---|------------|-------------|-------------|
| H | 4.96967500 | 1.76465700  | 2.49125500  |
| H | 5.04865300 | 0.13260300  | 1.82671900  |
| H | 3.48004800 | 0.87766100  | 2.13659200  |
| C | 6.47473800 | 4.31013900  | -1.53399600 |
| H | 5.97913700 | 5.28401200  | -1.45603200 |
| H | 6.86528200 | 4.22361900  | -2.55102200 |
| H | 7.32099200 | 4.31500000  | -0.84370800 |
| C | 2.80727900 | 1.18642500  | -3.00860400 |
| H | 3.13861300 | 1.54809800  | -3.98347800 |
| H | 1.77921900 | 1.52492200  | -2.85984200 |
| H | 2.78260800 | 0.09374100  | -3.04080700 |
| C | 4.57841700 | -1.65864200 | -0.50813800 |
| C | 5.32186500 | -1.35285300 | -1.65542900 |
| H | 4.87417400 | -0.77265000 | -2.45109500 |
| C | 6.63516000 | -1.79458700 | -1.78899900 |
| H | 7.19409600 | -1.54730800 | -2.68451800 |
| C | 7.22746800 | -2.55293200 | -0.78220200 |
| H | 8.24992800 | -2.89743500 | -0.88875800 |
| C | 6.49743900 | -2.86623700 | 0.36222900  |
| H | 6.94834000 | -3.45614000 | 1.15215600  |
| C | 5.18639200 | -2.42162200 | 0.49957900  |
| H | 4.62273000 | -2.66800000 | 1.39082800  |
| C | 2.08865500 | -3.46573700 | 0.08869700  |
| C | 2.60015200 | -4.27657900 | -0.93199000 |
| H | 2.89482300 | -3.82612400 | -1.87255000 |
| C | 2.73331900 | -5.64931300 | -0.74908200 |
| H | 3.12862500 | -6.26288800 | -1.55095300 |
| C | 2.35861200 | -6.23165500 | 0.45930100  |
| H | 2.45946300 | -7.30163400 | 0.60350600  |
| C | 1.85180900 | -5.43178100 | 1.48184400  |
| H | 1.55856800 | -5.87748300 | 2.42572500  |
| C | 1.71952800 | -4.05853900 | 1.30230400  |

|   |             |             |             |
|---|-------------|-------------|-------------|
| H | 1.33136500  | -3.43760700 | 2.10113800  |
| C | -1.04332100 | -2.87094200 | 0.09882400  |
| C | -0.78073400 | -3.43324700 | -1.16092400 |
| H | -0.19137300 | -2.87509500 | -1.88177100 |
| C | -1.22396900 | -4.70548800 | -1.51123100 |
| H | -0.98998300 | -5.10867500 | -2.49093700 |
| C | -1.95317800 | -5.46472400 | -0.59938400 |
| H | -2.29348100 | -6.46050100 | -0.86238000 |
| C | -2.23210100 | -4.93296000 | 0.65655800  |
| H | -2.79554400 | -5.51320200 | 1.37973800  |
| C | -1.78259500 | -3.65797000 | 0.99336900  |
| H | -2.01329800 | -3.27520400 | 1.98224000  |
| C | -1.41680200 | -0.15448400 | -0.04490400 |
| C | -2.06712800 | 1.99550000  | -0.08266900 |
| C | -3.17258800 | 1.22876800  | -0.33790100 |
| C | -3.65476500 | -1.19970900 | -0.60954200 |
| C | -4.51832900 | -1.65156300 | 0.39555600  |
| C | -5.43237200 | -2.65423300 | 0.06515400  |
| H | -6.10160100 | -3.01995900 | 0.83765200  |
| C | -5.50856100 | -3.19550300 | -1.21644200 |
| C | -4.64458900 | -2.70126900 | -2.19500000 |
| H | -4.69560100 | -3.10246600 | -3.20240900 |
| C | -3.71267600 | -1.70257100 | -1.91795600 |
| C | -2.80784200 | -1.18612700 | -3.00886700 |
| H | -2.77824700 | -0.09350700 | -3.03738200 |
| H | -3.14280700 | -1.54303900 | -3.98426800 |
| H | -1.78102500 | -1.52989200 | -2.86339400 |
| C | -6.47504300 | -4.30993800 | -1.53368400 |
| H | -5.98223500 | -5.28432000 | -1.44475500 |
| H | -6.85737700 | -4.22987500 | -2.55430200 |
| H | -7.32668300 | -4.30808300 | -0.84999600 |
| C | -4.49519800 | -1.07701600 | 1.78898400  |

|    |             |             |             |
|----|-------------|-------------|-------------|
| H  | -3.47943200 | -0.87842100 | 2.13671200  |
| H  | -4.96923200 | -1.76511800 | 2.49143600  |
| H  | -5.04788100 | -0.13293400 | 1.82719300  |
| C  | -4.57834500 | 1.65861300  | -0.50804200 |
| C  | -5.18665500 | 2.42085400  | 0.50001300  |
| H  | -4.62325000 | 2.66667900  | 1.39158100  |
| C  | -6.49769600 | 2.86547600  | 0.36256600  |
| H  | -6.94888900 | 3.45481000  | 1.15275100  |
| C  | -7.22732900 | 2.55293000  | -0.78232100 |
| H  | -8.24977800 | 2.89744300  | -0.88896100 |
| C  | -6.63464900 | 1.79536300  | -1.78949300 |
| H  | -7.19328600 | 1.54871800  | -2.68537300 |
| C  | -5.32137200 | 1.35361500  | -1.65581500 |
| H  | -4.87331800 | 0.77405200  | -2.45175100 |
| C  | -2.08867600 | 3.46569000  | 0.08897400  |
| C  | -2.60042300 | 4.27658600  | -0.93154800 |
| H  | -2.89519100 | 3.82620600  | -1.87211200 |
| C  | -2.73370600 | 5.64928800  | -0.74848300 |
| H  | -3.12920600 | 6.26289700  | -1.55023200 |
| C  | -2.35886300 | 6.23155200  | 0.45989600  |
| H  | -2.45980700 | 7.30150500  | 0.60422500  |
| C  | -1.85181200 | 5.43162500  | 1.48227300  |
| H  | -1.55846300 | 5.87726000  | 2.42615300  |
| C  | -1.71941600 | 4.05841500  | 1.30257800  |
| H  | -1.33106900 | 3.43745500  | 2.10129900  |
| N  | 0.97791000  | -1.12348400 | 0.05203600  |
| N  | 2.75164400  | 0.10548500  | -0.32920200 |
| N  | -0.97784400 | 1.12343900  | 0.05214400  |
| N  | -2.75159900 | -0.10551400 | -0.32907100 |
| Se | 0.52031400  | 1.07565100  | 2.60622500  |
| Se | -0.52000700 | -1.07573900 | 2.60624500  |

**Table S5.** Experimental and calculated  $^{11}\text{B}$  NMR chemical shifts of compounds **2**, **3** and **4**.

|                                                      | Isotropic Values | Calculated $\delta (^{11}\text{B})[\text{ppm}]$ | Experimental $\delta (^{11}\text{B})[\text{ppm}]$ |
|------------------------------------------------------|------------------|-------------------------------------------------|---------------------------------------------------|
| <b>2</b>                                             | 104.0800         | -0.6621                                         | -0.89                                             |
|                                                      | 104.0803         | -0.6624                                         |                                                   |
| <b>3</b>                                             | 83.4751          | 19.9                                            | 10.28                                             |
|                                                      | 83.4775          | 19.9                                            |                                                   |
| <b>4</b>                                             | 104.8418         | -1.4239                                         | 1.04                                              |
|                                                      | 104.8409         | -1.4230                                         |                                                   |
| <b>BF<sub>3</sub>.Et<sub>2</sub>O</b><br>(Reference) | 103.4179         | -                                               | -                                                 |

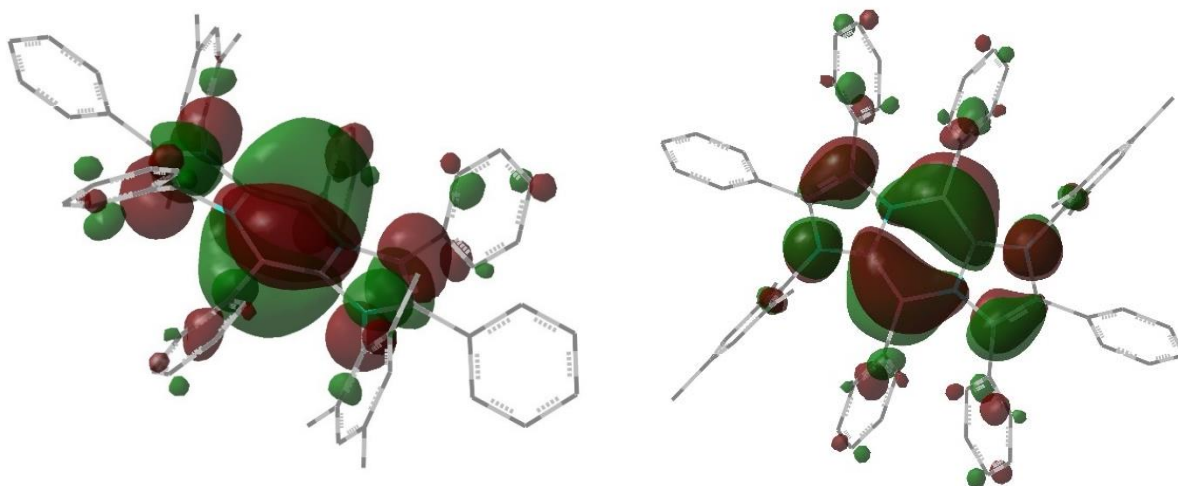

**Figure S24.** Side view (left) and front view (right) of the HOMO of **3**.

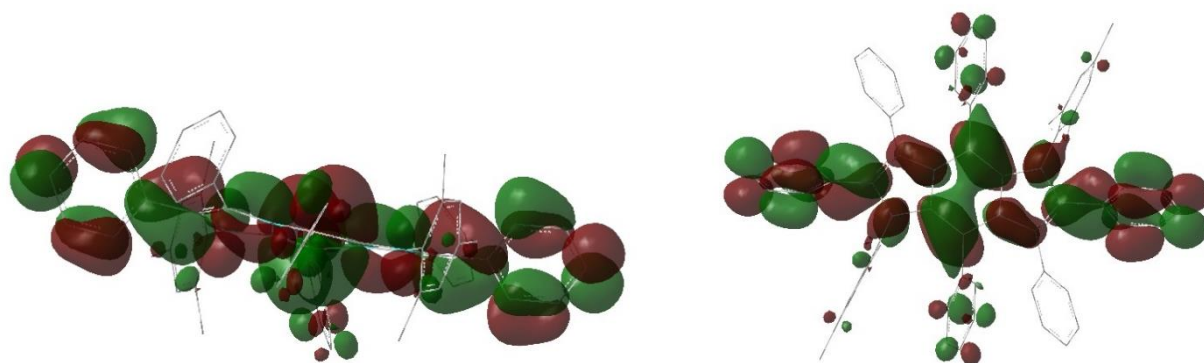

**Figure S25.** Side view (left) and front view (right) of the LUMO of **3**.

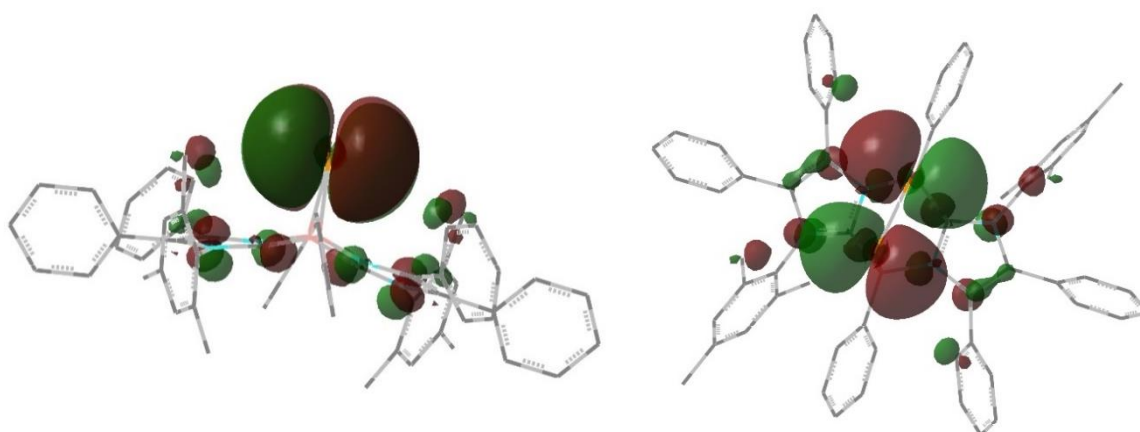

**Figure S26.** Side view (left) and top view (right) of the HOMO of **4**.

## 5. References

1. Sheldrick, G. M. (2015). *Acta Cryst.* **A71**, 3-8.
2. Sheldrick, G. M. (2015). *Acta Cryst.* **C71**, 3–8.
3. Gaussian 09, Revision B.01, Frisch, M. J.; Trucks, G. W.; Schlegel, H. B.; Scuseria, G. E.; Robb, M. A.; Cheeseman, J. R.; Scalmani, G.; Barone, V.; Mennucci, B.; Petersson, G. A.; Nakatsuji, H.; Caricato, M.; Li, X.; Hratchian, H. P.; Izmaylov, A. F.; Bloino, J.; Zheng, G.; Sonnenberg, J. L.; Hada, M.; Ehara, M.; Toyota, K.; Fukuda, R.; Hasegawa, J.; Ishida, M.; Nakajima, T.; Honda, Y.; Kitao, O.; Nakai, H.; Vreven, T.; Montgomery, J. A., Jr.; Peralta, J. E.; Ogliaro, F.; Bearpark, M.; Heyd, J. J.; Brothers, E.; Kudin, K. N.; Staroverov, V. N.; Kobayashi, R.; Normand, J.; Raghavachari, K.; Rendell, A.; Burant, J. C.; Iyengar, S. S.; Tomasi, J.; Cossi, M.; Rega, N.; Millam, J. M.; Klene, M.; Knox, J. E.; Cross, J. B.; Bakken, V.; Adamo, C.; Jaramillo, J.; Gomperts, R.; Stratmann, R. E.; Yazyev, O.; Austin, A. J.; Cammi, R.; Pomelli, C.; Ochterski, J. W.; Martin, R. L.; Morokuma, K.; Zakrzewski, V. G.; Voth, G. A.; Salvador, P.; Dannenberg, J. J.; Dapprich, S.; Daniels, A. D.; Farkas, Ö.; Foresman, J. B.; Ortiz, J. V.; Cioslowski, J.; Fox, D. J. Gaussian, Inc., Wallingford CT, 2013.
4. Reed, A. E.; Curtis, L. A.; Weinhold, F. *Chem. Rev.* **1988**, *88*, 899–926.
